# Supplementary material for: Tunable band gaps and conduction band edges of CdS/ZnS heterostructures – a first-principles-based prediction
Source: Royal Society of Chemistry journal article supplement (doi:10.1039/d4cp03827d), 2024-12-17
Supplement: d4cp03827d1.pdf [file d4cp03827d1.pdf]

## Tunable Band Gaps and Conduction Band Edges of CdS/ZnS Heterostructures – A First-Principles-Based Prediction

Fengai Zhao,<sup>a,\*</sup> Dingbo Zhang<sup>a</sup>, Yuxiang Ni<sup>a</sup>, Hongyan Wang<sup>a</sup> and Shuming Peng<sup>b</sup>

<sup>a</sup>*School of Physical Science and Technology, Southwest Jiaotong University, Chengdu, Sichuan 610031, China*

<sup>b</sup>*Institute of Nuclear Physics and Chemistry, China Academy of Engineering Physics, Mianyang 621900, Sichuan, China*

The density of states for the  $\text{Cd}_{0.5}\text{Zn}_{0.5}\text{S}$  solid solution was calculated to further investigate the differences between the solid solution effect and the covalent heterostructure effect on improved photocatalytic performance. The structural model for the  $\text{Cd}_{0.5}\text{Zn}_{0.5}\text{S}$  solid solution was constructed using the special quasi-random structure (SQS) approach. Our calculations reveal that the band gap for the  $\text{Cd}_{0.5}\text{Zn}_{0.5}\text{S}$  solid solution is 2.68 eV (Figure S1), which is significantly larger than the 2.07 eV observed for the  $(\text{CdS})_5/(\text{ZnS})_5$  heterostructure. The reduced band gap in the CdS-ZnS heterostructure naturally leads to enhanced photocatalytic performance. These findings indicate that, for the CdS-ZnS system, the covalent heterostructure effect plays a more significant role in improving photocatalytic performance compared to the solid solution effect.

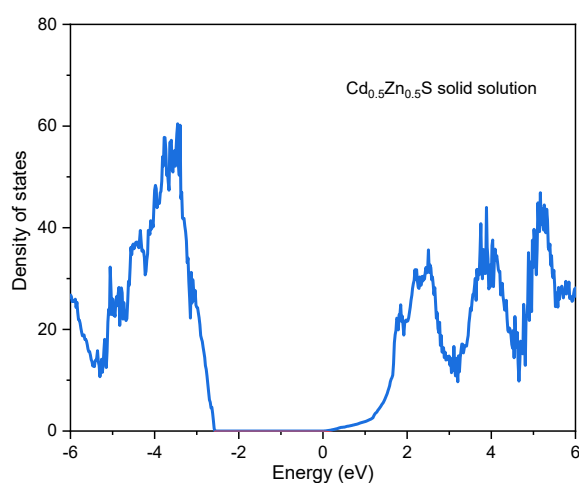

**Figure S1.** Density of states for a  $\text{Cd}_{0.5}\text{Zn}_{0.5}\text{S}$  solid solution.
